# Supplementary material for: Assessment of gap-filling techniques applied to satellite phytoplankton composition products for the Atlantic Ocean
Source: Copernicus journal article supplement (doi:10.5194/egusphere-2025-112), 2025-03-12
Supplement: Supplementary file 1 [file egusphere-2025-112-supplement.pdf]

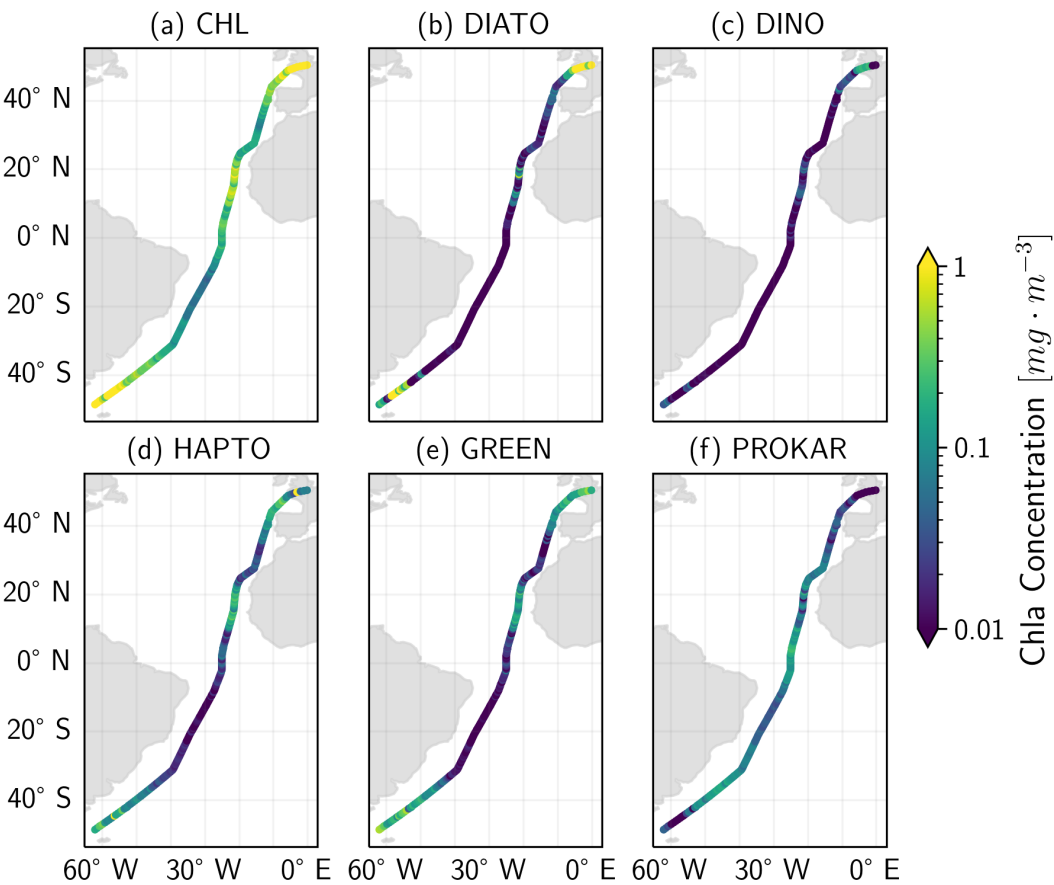

Figure S1: TChla and PFTs estimated from phytoplankton pigment derived from water samples using the HPLC technique. Dataset sourced from Bracher et al. (2020b) and processed with diagnostic pigment analysis following Xi et al. (2023a).

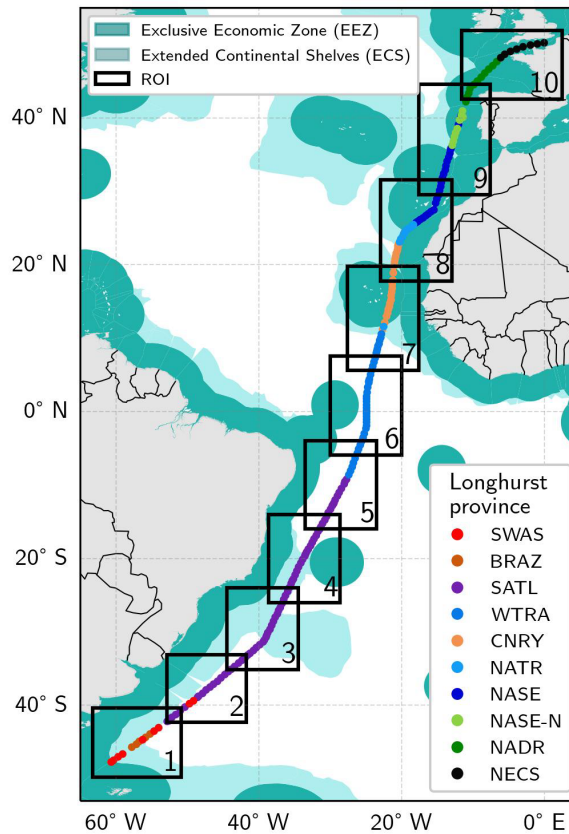

Figure S2: Regions of interest (ROI) analysed in this study, overlaid on continental shelves region (Flanders Marine Institute, 2023, 2024) to emphasise coastal dynamics, and in situ measurements clustered by Bracher et al. (2020a) into Longhurst biogeographical provinces to highlight ecological zones. The in situ measurements clustered to Longhurst provinces are provided by Bracher et al. (2020b).

Table S1: DINEOF hyperparameters along with their distribution, selection range and optimal value.

| Parameter                                 | Description               | Selection range | Distribution | Optimal value |
|-------------------------------------------|---------------------------|-----------------|--------------|---------------|
| $\alpha$                                  | Strength of Filter        | [5e-3 – 5e-1]   | Log-uniform  | 7.6e-2        |
| P                                         | Number of Iteration       | [1 - 20]        | Uniform      | 11            |
| SST                                       | Use SST in reconstruction | Boolean         | Uniform      | False         |
| CV RMSLE on the validation dataset = 0.12 |                           |                 |              |               |

Table S2: DINCAE hyperparameters along with their distribution, selection range and optimal value.

| Parameter  | Description                     | Selection range | Distribution | Optimal value |
|------------|---------------------------------|-----------------|--------------|---------------|
| SST        | Use SST in reconstruction       | Boolean         | Uniform      | False         |
| jitter_std | Standard Deviation of the noise | [0 – 0.1]       | Uniform      | 0.035         |
| epochs     | Number of epochs to run the     | [600 – 1200]    | Uniform      | 900           |

| model                                     |                                            |                               |               |                         |
|-------------------------------------------|--------------------------------------------|-------------------------------|---------------|-------------------------|
| batch_size                                | Batch size                                 | [16 – 64]                     | Uniform       | 29                      |
| enc_nfilter_internal                      | Number and size of layers                  | First layer = [32 – 64]       | Uniform       | [60, 98, 159, 258]      |
|                                           |                                            | Increase power = [1.5 – 2]    | Uniform       |                         |
|                                           |                                            | Number of layers = [3 – 4]    | Uniform       |                         |
| ntime_win                                 | Window of timeseries                       | [3, 5, 7]                     | Uniform       | 3                       |
| upsampling_method                         | Interpolation method in decoder            | [nearest, bilinear]           | Uniform       | Nearest                 |
| loss_weights_refine                       | Refinement control coefficient             | $\alpha' + \alpha = 1$        | Uniform       | $\alpha = 0.32$         |
|                                           |                                            | $\alpha = [0 - 0.5]$          |               | $\alpha' = 0.68$        |
|                                           |                                            | $\alpha' = [0.5 - 1]$         |               |                         |
| Learning Rate                             | Learning rate of the optimizer             | [1e-4 – 1e-3]                 | Log-uniform   | 1.49e-4                 |
| regularization_L2_beta                    | L2 regularization weight                   | [1e-4 – 1e-2]                 | Log-uniform   | 9.2e-4                  |
| laplacian_penalty                         | Smoothness regularization                  | [False or True (1e-6 – 1e-2)] | Uniform       | False                   |
|                                           |                                            |                               | (Log-uniform) |                         |
| Fix Parameters                            |                                            |                               |               |                         |
| skip-connection                           | Number of layers with skip-connection      |                               |               | All layers except first |
| Optimizer                                 | Method to adjusts weights to minimize loss |                               |               | Adam                    |
| Activation Function                       | Introducing non-linearities to the network |                               |               | Leaky ReLU              |
| CV RMSLE on the validation dataset = 0.12 |                                            |                               |               |                         |
